# Supplementary material for: Tuberous sclerosis complex is required for tumor maintenance in MYC‐driven Burkitt's lymphoma
Source: PubMed Central journal article supplement — EMBO J. 2018 Sep 20;37(21):e98589. doi: 10.15252/embj.201798589 (PMC6213278; doi:10.15252/embj.201798589), 2018-09-20
Supplement: EMBJ-37-e98589-s002.pdf [file EMBJ-37-e98589-s002.pdf]

**Table EV1**

Table of predicted microRNA binding sites in the 3'UTR of the *TSC1* mRNA. All listed microRNAs are direct MYC targets and were shown to be downregulated in Burkitt's lymphoma (BL) compared to low-MYC non-Hodgkin lymphomas (NHL). Data derived from: Robertus et al. 2010, MiRNA profiling in B non-Hodgkin lymphoma: a MYC-related miRNA profile characterizes Burkitt lymphoma. *British J. Haematology* 149, 896-899.

**microRNAs with seed sequences in the *TSC1*-3'UTR**

| microRNA | seed sequence | position in <i>TSC1</i> -3'UTR | fold downregulation BL vs. NHL* | P-value* |
|----------|---------------|--------------------------------|---------------------------------|----------|
| 15a      | UGCUGCU       | 4015-4021                      | 3                               | 0.0064   |
| 16-1     |               |                                | 2                               | 0.0035   |
| 195      |               |                                | 5                               | 0.0010   |
| 22       | GGCAGCU       | 1088-1094                      | 2                               | 0.0188   |
| 23a      | AAUGUGAA      | 3884-3891                      | 2                               | 0.0013   |
| 23b      |               |                                | 2                               | 0.0064   |
| 26a      | UGAACU        | 3524-3530                      | 7                               | 0.0010   |
| 26b      |               |                                | 4                               | 0.0010   |
| 29a      | UGGUGCU       | 4398-4404                      | 9                               | 0.0010   |
| 29b      |               |                                | 8                               | 0.0010   |
| 29c      |               |                                | 16                              | 0.0010   |
| 30e-5p   | UGUUUACA      | 3884-3891                      | 6                               | 0.0010   |

\*Significant difference between high MYC Burkitt's Lymphoma (BL) and low MYC Non-Hodgkin Lymphomas (NHL: CLL, MCL and FL).

Data from Robertus et al (2010) *British J. Haematology* 149, 896-899.
